# 1 **Dynamic macromolecular composition and high exudation rates in** 2 ***Prochlorococcus***

3

4 Dalit Roth-Rosenberg<sup>1</sup>, Dikla Aharonovich<sup>1</sup>, Anne-Willem Omta<sup>2</sup>, Michael J. Follows<sup>2</sup> and Daniel  
5 Sher<sup>1</sup>

6 <sup>1</sup> Department of Marine Biology, Leon H. Charney School of Marine Sciences, University of Haifa,  
7 Israel, <sup>2</sup> Department of Earth, Atmospheric and Planetary Sciences, Massachusetts Institute of  
8 Technology, USA

9

## 10 **Abstract**

11 Every living cell is composed of macromolecules such as proteins, DNA, RNA and pigments or  
12 cofactors. The ratio between these macromolecular pools depends on the allocation of resources within  
13 the organism to different physiological requirements, and in turn determines the elemental composition  
14 of the organism and, potentially, how it may affect biogeochemical cycles of elements such as carbon,  
15 nitrogen and phosphorus. Here, we present detailed measurements of the macromolecular composition  
16 of *Prochlorococcus* MIT9312, a representative strain of a globally abundant marine primary producer,  
17 as it grows and declines due to N starvation in laboratory batch cultures. As cells reached stationary  
18 stage and declined, protein/cell decreased by ~30% and RNA/cell and pigments/cell decreased by an  
19 order of magnitude. The decline stage was associated with the appearance of chlorotic cells which had  
20 higher forward scatter (a proxy for cell size) but lower chlorophyll autofluorescence, as well as with  
21 changes in photosynthetic pigment composition. Specifically, during culture decline divinyl-  
22 chlorophyll-like pigments emerged, which were not observed during exponential growth. These

23 divinyl-chlorophyll-like pigments were also observed in natural samples from the Eastern  
24 Mediterranean. Around 80-85% of the carbon fixed by *Prochlorococcus* MIT9312 (but not of a  
25 different strain, NATL2A) was released into the growth media as dissolved organic carbon under these  
26 laboratory conditions. Broadly defined, the macromolecular composition of *Prochlorococcus*  
27 MIT9312 is more similar to eukaryotic phytoplankton than to marine heterotrophic bacteria, suggesting  
28 a different set of physiological constraints determines the macromolecular composition of these two  
29 broad classes of marine microorganisms.

30

31 **Keywords: Prochlorococcus, Photosynthetic pigments, Macromolecular pools, exudation,**  
32 **ribosomes**

33

34

## 35 **Introduction**

36 Like every cell on Earth, phytoplankton and bacterioplankton are composed of several classes of  
37 biological macromolecules that function together to maintain the cells structure and activity (Geider  
38 and La Roche 2002, Finkel et al. 2016). Proteins are the most abundant macromolecule (in terms of  
39 mass), responsible for most of the metabolic functionality of the cells. DNA stores hereditary  
40 information, whereas RNA (as mRNA or other regulatory RNAs) accesses this stored data and (as  
41 rRNA and tRNAs) uses it to produce protein. Lipids form the membrane(s) that separate the cell from  
42 its environment and, in the case of photosynthetic organisms, host the molecular machinery used to  
43 harvest light for energy. This molecular machinery includes, in addition to proteins, also photosynthetic  
44 pigments and other metabolites. Finally, various storage molecules (including some lipids,  
45 carbohydrates, polyphosphate and other storage molecules) allow cells to retain energy and elements  
46 for future use, and a host of other metabolites are involved in all forms of cellular function. The relative  
47 amount of each of these classes of macromolecules changes between different phytoplankton groups  
48 (Vargas et al. 1998, Geider and La Roche 2002, Finkel et al. 2016), and may also change within a  
49 single type of organism in response to environmental conditions (Vargas et al. 1998, Liefer et al. 2019).  
50 For example, the relative amount of chlorophyll-a per cell changes in response to light intensity (e.g.  
51 (Moore et al. 1995)) and may also change in response to nutrient starvation (Lourenço et al. 1998,  
52 Liefer et al. 2019). This affects the ability of photosynthetic cells to harvest light and fix carbon,  
53 impacting cell physiology and likely the interactions of the cell with other organisms, e.g. through the  
54 release of fixed organic carbon (Dubinsky and Berman-Frank 2001). Similarly, it has been suggested  
55 that the number of ribosomes per cell is a strong determinant of cellular growth rate, and is itself  
56 affected by temperature and nutrient (particularly phosphorus, P) availability (e.g. (Elser et al. 2003,  
57 Garcia et al. 2016, Martiny et al. 2016)). Thus, to some extent, the macromolecular composition of the  
58 cell is affected by, and may shed light on, the allocation of cellular resources to different functions.

59 The basic building blocks of biological macromolecules such as amino acids and nucleic acids have  
60 distinct elemental composition, and the macromolecular composition of the cell is thus intimately  
61 linked with its elemental composition (Geider and La Roche 2002, Finkel et al. 2016, Garcia et al.  
62 2016, Liefer et al. 2019). In phytoplankton, proteins generally comprise the largest pool in terms of  
63 cell biomass (dry weight) as well as nitrogen and carbon (N and C) pools (Lourenço et al. 1998, Vargas  
64 et al. 1998, Geider and La Roche 2002, Finkel et al. 2016). Other macromolecules such as Nucleic  
65 acids and pigments contribute less to total cell biomass yet contribute significantly to the pools of N  
66 and phosphorus (P) (Geider and La Roche 2002, Finkel et al. 2016, Liefer et al. 2019). Thus, the  
67 macromolecular composition of the cell will determine its elemental composition, which in turn will  
68 determine the effect of the cell on biogeochemical cycles of elements. Over the last ~85 years (Redfield  
69 1934) significant advancements have been made in our understanding of how the elemental ratios in  
70 marine organisms change over time and space, how they are affected by cell physiology, and how they  
71 are related to surrounding nutrient element concentrations (e.g. (Martiny et al. 2013, Gruber and  
72 Deutsch 2014)). Significantly less is known about the dynamics of the macromolecular composition of  
73 marine organisms, which underlie elemental composition. Similarly, most of the models of ocean  
74 communities and their effect on biogeochemistry are formulated using elements as the model currency  
75 rather than macromolecules (Omta et al. 2009, Goebel et al. 2010, Talmy et al. 2016). In order to  
76 obtain a better understanding of the dynamics of the macromolecular composition of organisms, and  
77 to link these to elemental ratios, experimental measurements are needed, particularly in abundant  
78 marine organisms.

79 Here, we measure the cellular pools of major macromolecules (protein, DNA, RNA and pigments) in  
80 laboratory batch cultures of *Prochlorococcus*, a highly abundant pico-cyanobacterium which is  
81 responsible for ~8.5% of the oceanic photosynthesis (Partensky and Garczarek 2010, Flombaum et al.  
82 2013, Biller et al. 2014). *Prochlorococcus*, as a clade, comprise multiple genotypes, each different in

83 its physiology, genome structure and oceanic niche (Johnson et al. 2006, Biller et al. 2014). Many  
84 aspects of the physiology of the *Prochlorococcus* clade have been intensively studied, ranging from its  
85 elemental composition (Bertilsson et al. 2003, Martiny et al. 2013) through its photophysiology (Moore  
86 et al. 1995, Moore and Chisholm 1999, Ting et al. 2002, Steglich et al. 2003, Komatsu et al. 2016) to  
87 its system-wide transcriptomic response to changes in environmental conditions (e.g. (Martiny et al.  
88 2006, Tolonen et al. 2006, Thompson et al. 2011, Aharonovich and Sher 2016). Yet, detailed analyses  
89 of the macromolecular composition of the cells are lacking, even though changes in the elemental  
90 composition of *Prochlorococcus* that are observed in response to environmental conditions are in fact  
91 due to changes in the macromolecular composition of the cells (E.g. (Bertilsson et al. 2003, Van Mooy  
92 et al. 2006, Martiny et al. 2013, Martiny et al. 2016)). The strain we focus on, MIT9312, represents the  
93 high-light adapted HL-II clade which is the most abundant clade in the surface waters of large parts of  
94 the ocean (Bouman et al. 2006, Johnson et al. 2006). We chose to follow batch cultures of  
95 *Prochlorococcus* MIT9312 under conditions where entry into stationary stage occurs when the N  
96 source in the media is depleted for several reasons. First, N stress affects *Prochlorococcus* in large  
97 parts of the ocean (e.g.(Saito et al. 2014)), and significant information is available as to the  
98 physiological, transcriptomic and evolutionary responses of the cells to acute N starvation (Steglich et  
99 al. 2001, Moore et al. 2002, Tolonen et al. 2006, Gilbert and Fagan 2011, McDonagh et al. 2012, Read  
100 et al. 2017, Berube et al. 2019, Szul et al. 2019). Second, long-term analyses of batch cultures may  
101 identify cellular physiological processes not seen when cells are growing exponentially or exposed to  
102 sudden or short-term nutrient starvation (e.g. (Christie-Oleza et al. 2017, Roth-Rosenberg et al. 2019)).  
103 Indeed, it is an open question to what extent stationary-phase and culture decline in batch cultures  
104 represent conditions found in nature, yet we show that a pigment identified in our cultures during the  
105 culture decline stage is found in the oceans, raising the possibility that some cells in nature are indeed  
106 found in these physiological stages. Finally, we measured, in addition to the cellular macromolecular

107 pools, also the concentrations of TOC in the media, extracting from these measurements estimates of  
108 the release of DOC from the cells. This release may be due to passive exudation, active excretion and  
109 cell lysis (reviewed by (Thornton 2014)). Some of the released macromolecules are available for  
110 subsequent utilization by other organisms, whereas another part contributes to a huge pool of long-  
111 lived oceanic DOM, potentially impacting global biogeochemical cycles (Hansell et al. 2009).

112

## 113 **Materials and Methods**

### 114 **Growth conditions and experimental procedure**

115 To follow the growth and macromolecular composition of *Prochlorococcus* over the various stages of  
116 laboratory batch culture, axenic *Prochlorococcus* MIT9312 cultures were grown in 1 liter bottles of  
117 Pro99 media (Moore et al. 2007) where the  $\text{NH}_4$  concentration was lowered to  $100\mu\text{M}$ , leading to  
118 cessation of cell growth due to N starvation (Grossowicz et al. 2017). The experiment included 15  
119 bottles, three of which were used for routine culture monitoring and the other 12 were used to collect  
120 samples at four time-points, corresponding to exponential growth ( $t=6$  days), early stationary stage  
121 ( $t=10$  days), late stationary stage ( $t=13$  days) and culture decline ( $t=15$  days). Samples were also  
122 collected from the starter culture to represent  $t=0$ . The number and timing of the samples collected for  
123 full analysis were selected in order to provide appropriate data for subsequent modeling (Omta et al.  
124 2017). This experimental design was used to minimize the chance for contamination of the axenic  
125 cultures with heterotrophic bacteria. The cell numbers of the cultures used for macromolecular analysis  
126 were never statistically different from those of the cultures used for monitoring (Students t-test).

127 Prior to the beginning of the experiment, cells from a mid-exponential culture were counted by flow  
128 cytometry (FACSCantoII, BD), and diluted in the new media to an initial cell density of  $10^6/\text{ml}$ .  
129 Cultures were maintained under constant light ( $22\mu\text{E}$ ), at  $24.5 \pm 1^\circ\text{C}$ .  $1\text{mM NaHCO}_3$  was supplemented

130 at three different time points (T=0, T=7, T=11 days) to verify that the cultures are not carbon-limited  
131 (Moore et al. 2007, Grossowicz et al. 2017). Bulk culture fluorescence was measured in samples  
132 collected aseptically from the three monitoring bottles using a Carey Eclipse spectrofluorometer (Ex  
133 440nm/Em 680nm). Samples for cell counting were fixed in 0.25% glutaraldehyde, kept in the dark  
134 for 10 minutes and transferred to a -80°C freezer for subsequent flow cytometry analysis.

135

### 136 **Measurements of macromolecular pools and photosynthetic pigments.**

137 At each of the five time-points selected, cells were collected by filtration. For protein measurements,  
138 cells were gently filtered on 0.22µm polycarbonate filters and kept in -80°C until extraction. For protein  
139 extraction, the filters were incubated in 500µl lysis buffer (50mM Tris pH6.8, 5mM EDTA, 2%SDS)  
140 on a lab rotator at 37°C for 20'. Following incubation, samples were sonicated in water bath for 10',  
141 centrifuged at 12,000g in a table-top micro-centrifuge for 5', and the supernatant liquid taken for  
142 measurement using the Bicinchoninic acid assay (BCA, Sigma). Nucleic acids were collected similarly  
143 on 0.22 µm Supor-200 Membrane Disc Filters (25 mm; Pall Corporation) and preserved in storage  
144 buffer (40 mM EDTA, 50 mM Tris pH 8.3, 0.75 M sucrose) and RNA Save (Biological Industries) for  
145 DNA and RNA measurements, respectively. Samples were kept at -80°C until extraction. DNA was  
146 extracted from the filters according (Massana et al. 1997). Total RNA was extracted using the mirVana  
147 miRNA kit (Ambion, Austin, TX, USA) as described in with lysozyme treatment for better lysis  
148 (Tolonen et al. 2006), follow by removal of contaminating DNA from total RNA by Turbo DNase  
149 (Ambion). Nucleic acids quantity measured using Qubit 2.0 (Invitrogen). For pigment analysis,  
150 samples were collected on Glass Fiber filters (25 mm GF/F, Whatman) and kept in -80C until  
151 extraction. Glass fiber filters were used, rather than polycarbonate filters, as the latter are not  
152 compatible with many extraction methods for pigments. Nevertheless, preliminary experiments using

153 a culture of *Prochlorococcus* MED4, which is similar in size to MIT9312, showed that with the vacuum  
154 pumps we used approximately 99.9% of the cells were retained on the GF/F membrane (Marmen et al.  
155 2018), and thus the difference in pore size has minimal effect on the results. Cells were extracted in  
156 100% methanol at 25°C for 2h. The cell extracts were clarified with Syringe filters (Acrodisc CR, 13  
157 mm, 0.2 µm PTFE membrane, Pall Life Sciences), and kept at -20°C until analysis by column  
158 chromatography on a C8 column (1.7 µm particle size, 2.1 mm internal diameter, 50 mm column  
159 length, ACQUITY UPLC BEH, 186002877) using an ACQUITY UPLC system equipped with a  
160 Photodiode Array detector (Waters). The chromatography protocol was based on LOV method  
161 (Hooker *et al.* 2005) modified for UPLC. A linear gradient was applied over 14 minutes, where solvent  
162 A was 70:30 methanol:0.5 M ammonium acetate, and solvent B was B. 100% methanol. The flow rate  
163 was 0.5 ml/min, and the column and injection heating were set to 50°C and 30°C, respectively. To  
164 identify and calculate pigments concentration, the following standards were used: Divinyl chlorophyll  
165 A (DVchlA), chlorophyll B (chlB), chlorophyll C (chlC), zeaxanthin (Zea),  $\alpha$ -carotene ( $\alpha$ -car), Divinyl  
166 Protochlorophyllide (MGDVP), Pheophorbide a, Pheophytin a and Chlorophyllide a. All standards  
167 were from DHI, Denmark.

## 168 **Measurements of inorganic nutrients and TOC**

169 The GF/F filtrates (see above) were kept in polypropylene at -20°C until analysis. For measurements,  
170 samples were adjusted to 25°C and diluted 4-fold in DDW to reduce the salt level. NH<sub>4</sub> (NH<sub>3</sub>-N) was  
171 measured using an HI 96715 meter (Hanna instrument), and PO<sub>4</sub> was measured by HI 96713 meter  
172 (Hanna instrument). In both cases, low concentration kits were used. For Total Organic Carbon (TOC)  
173 analysis, samples were collected into cleaned, pre combusted, acid washed (10% HCL) 40ml vials and  
174 HCl was added to remove dissolved inorganic C before preservation at -20°C. Before analysis, samples  
175 were combusted at 680°C using catalytic (platinum) oxidation method in oxygen-rich environment.  
176 TOC analysis was performed using TOC-L analyzer (Shimadzu ASI-L Autosampler, Columbia, MD).



177 For inorganic carbon (DIC), samples were collected in 14ml dark glass vials with screw caps and 75 $\mu$ l  
178 (0.05% v/v) saturated HgCl<sub>2</sub> solution (Dickson et al. 2007) was added to the samples. For alkalinity,  
179 60 ml samples were collected in glass vials. All samples were kept in 4°C until measurement. CO<sub>2</sub> was  
180 extracted from the samples by acidification with phosphoric acid (H<sub>3</sub>PO<sub>4</sub>, 10%) using a custom,  
181 automated CO<sub>2</sub> extractor and delivery system (AERICA by MARIANDA) using high grade N<sub>2</sub> as a  
182 carrier gas, connected online with a LiCor 6252 IR CO<sub>2</sub> analyzer. Measurements were calibrated using  
183 seawater Certified Reference Materials (CRMs) from Dickson's lab. In order to check and correct for  
184 drift the CRM was run after every 4 samples.

185

### 186 **Model of *Prochlorococcus* resolving key macromolecular pools**

187 We formulated a mathematical model of the growth of a generalized axenic phytoplankton cell,  
188 which resolves the macromolecular pools measured in the experiments – protein, RNA, DNA and  
189 photosynthetic pigments, as well as N storage and dissolved organic carbon (Figure S3). The  
190 model is formulated in units of N in each macromolecular pool, with the C in each pool determined by  
191 the elemental ratios in each type of macromolecule (Geider and La Roche 2002). In this model, proteins  
192 act as enzymes in the synthesis of RNA, DNA and Chl, whereas RNA acts as an enzyme for the  
193 synthesis of proteins. The total organic carbon in the media (TOC, the sum of cellular C and DOC) is  
194 determined by the balance between photosynthesis and respiration. Since the cells are defined in terms  
195 of N, and the TOC is defined in units of C, the concentration of DOC is an emergent property of the  
196 model, and enables us to test under what conditions the model can reproduce high DOC production  
197 rates. We fit the model to the experimental data presented below, using the Metropolis-Hastings  
198 algorithm (Metropolis et al. 1953). A more detailed description of the model, including equations, can  
199 be found in the supplementary information, and the model itself (written in FORTRAN) is available  
200 on [https://github.com/AWO-code/DalitDaniel\\_Model](https://github.com/AWO-code/DalitDaniel_Model).

## 201 **Results**

### 202 **Dynamics of cell numbers and macromolecular composition during growth and nitrogen** 203 **starvation**

204 To determine to what extent the macromolecular composition of *Prochlorococcus* changes between  
205 the different physiological states of a batch culture, we grew strain MIT9312 in laboratory batch  
206 cultures where the N:P ratio of the media was set to 2, thus leading to cessation of growth due to N  
207 starvation (Grossowicz et al. 2017). The bulk culture fluorescence, often used to monitor phytoplankton  
208 growth in a non-invasive way, increased exponentially until day 10, after which the culture  
209 fluorescence declined rapidly, with no clearly observable stationary stage (Fig 1a). The decline of the  
210 culture fluorescence coincided with the reduction of soluble  $\text{NH}_4$  to below detection threshold  
211 ( $<10\mu\text{M}$ ), while  $\text{PO}_4$  and DIC levels remained high throughout growth and decline (Fig 1c, d). Cell  
212 counts by flow cytometry also showed an increase in the cell numbers until day 10, with a growth rate  
213 ( $\mu$ ) of  $0.353 \text{ day}^{-1}$  ( $\pm 0.0239$ ) and doubling time of 1.968 days ( $\pm 0.129$ ). However, unlike the bulk  
214 culture fluorescence that decline rapidly after this day, the cell numbers remained relatively stable for  
215 an additional 3-4 days, before starting to decline. During this period, a clear population of cells with  
216 low chlorophyll autofluorescence (low-fl) emerged, identified by flow cytometry (Fig 1b, 67% low-fl  
217 cells on day 13 and 88% on day 15, (Roth-Rosenberg et al. 2019)). These low-fl (“chlorotic”) cells  
218 were also stained much more weakly than the high-fl ones with the dye Sybr Green, which binds  
219 nucleic acids (primarily dsDNA but also ssDNA and RNA, Fig S1b). At the same time, an increase in  
220 Sybr-Green staining was observed in the high-fl cells, potentially related to the arrest of the cells in G2  
221 stage (Sup Fig. S1, (Zinser et al. 2009)). At the same time, the median forward scatter, a proxy for cell  
222 size, increased for both the high-fl and low fl cells. (Fig S1c).

223 Based on the observed fluorescence curves (Fig 1a), we sampled cells during exponential stage (day  
224 6), early stationary stage (day 10), late stationary stage (after bulk culture fluorescence had started to

225 decline but while cell numbers were still stable, day 13) and culture decline (day 15) (Table S1). An  
 226 additional estimate of the macromolecular pools from exponentially-growing cells was obtained from  
 227 the starter cultures used to start the experiment (treated here as day 0). The per-cell content of proteins  
 228 and RNA were relatively stable during exponential phase (0-10 days), but was reduced during the  
 229 stationary and decline phases (days 13 and 15) (Fig 1e-f). The reduction in RNA/cell (a drop of  
 230 approximately 75% between days 10 and 13) was much larger than that of protein/cell (10-30%). The  
 231 total photosynthetic pigment concentration per cell started declining earlier than RNA or protein, with  
 232 a drop of approximately 75% between days 6 and 10, as the cells moved from exponential growth to  
 233 early stationary stage (Fig 1g).

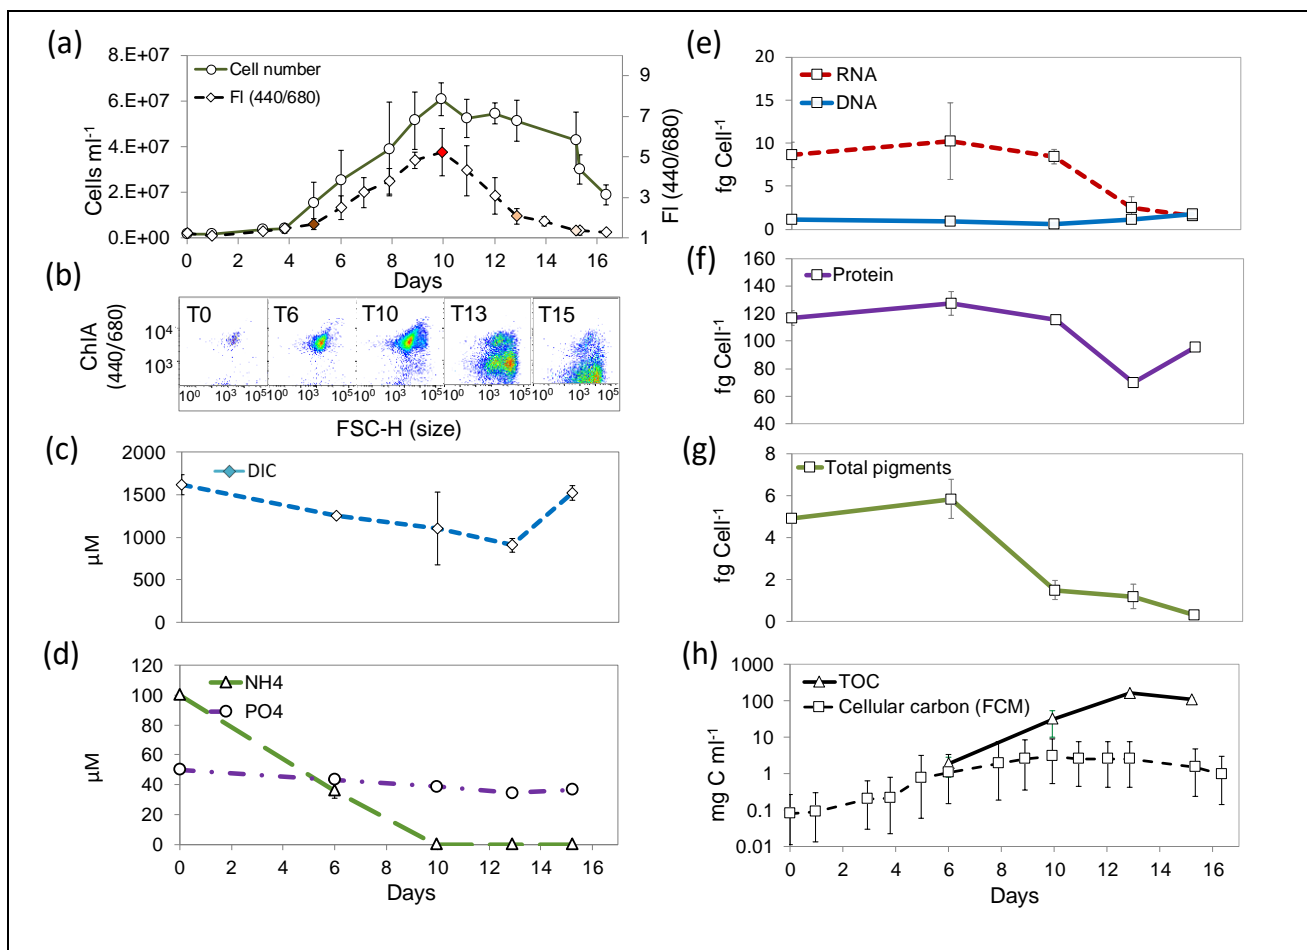

**Figure 1: Dynamics of culture growth, plateau and death in batch *Prochlorococcus* MIT9312 cultures reaching stationary growth due to nitrogen starvation. (a) Cell numbers and**

fluorescence curves of MIT9312 population shows a log-phase growth until day 10 than stationary and decline of the culture. (a) Flow cytometry scatter gram of specific measurements points. (c-d) Analysis of external inorganic nutrients shows that  $\text{NH}_4^+$  drops below detection limit, while  $\text{PO}_4$  and DIC are still available. Thus, the cultures enter stationary stage due to N starvation. Results are means and ranges of triplicate cultures. (e-g): Changes in the cell quotas of major macromolecules- DNA and RNA (e) proteins (f) and total pigments (g). While protein/cell is relatively stable, pigment and RNA pools drop as cells become starved and the culture declines. (h) Accumulation of large amounts of DOC. Triangles show measured Total Organic Carbon (TOC), squares show calculated C in cell biomass, based on flow cytometry counts and on per-cell C quotas. The error bars shown represents uncertainty due to the differences in estimates of per-cell C quotas between studies (Table 1), with the squares showing a value of  $50 \text{ fg cell}^{-1}$ .

234

235

### 236 **Changes in photosynthetic pigment composition across the different growth stages**

237 The reduction in chlorophyll autofluorescence per cell suggests changes to the photosynthetic  
238 machinery of the cells as they enter stationary stage and during culture decline. Indeed, as shown in  
239 Fig 2a, in addition to a reduction in the total pigment quota per cell (Fig 1g), the ratio of some accessory  
240 pigments to divinyl chlorophyll A (DVchlA) changed over time. Chlorophyll B and a chlorophyll-C  
241 like pigment were reduced compared to DVchlA after day 10, whereas the ratio of zeaxanthin (and  
242 also  $\alpha$ -carotene) to DVchlA increased after this day (Fig 2b). In addition, on day 10 and later, UPLC  
243 several peaks were observed close to that of DVchlA that differed from it in their retention time. These  
244 peaks were not due to overloading of the UPLC column (were not seen when higher amounts of  
245 pigments were injected),and were reproducibly observed in other cultures from multiple

246 *Prochlorococcus* strains. One of these peaks (marked with an arrow in Fig 2c), which was especially  
247 prominent, had an absorption spectrum similar to that of DVchlA (Fig 2d) but was not one of the known  
248 degradation products (pheophytin-A eluted later, whereas phaeophorbide A, chlorophyllide A and  
249 divinyl protochlorophyllide A all eluted much earlier, consistent with the loss of the phytol moiety).  
250 Assuming a similar molar absorption rate as DVchlA, this pigment (which may be a DVchlA', an  
251 epimerization product of DVchlA, (Komatsu et al. 2016)) comprised as much as 21% of the total  
252 DVchlA pigments on day 15, at the end of the decline stage. Importantly, pigments with the same  
253 elution time and absorbance were repeatedly observed in samples collected from the oligotrophic  
254 Eastern Mediterranean Sea, as demonstrated in Fig S2.

255

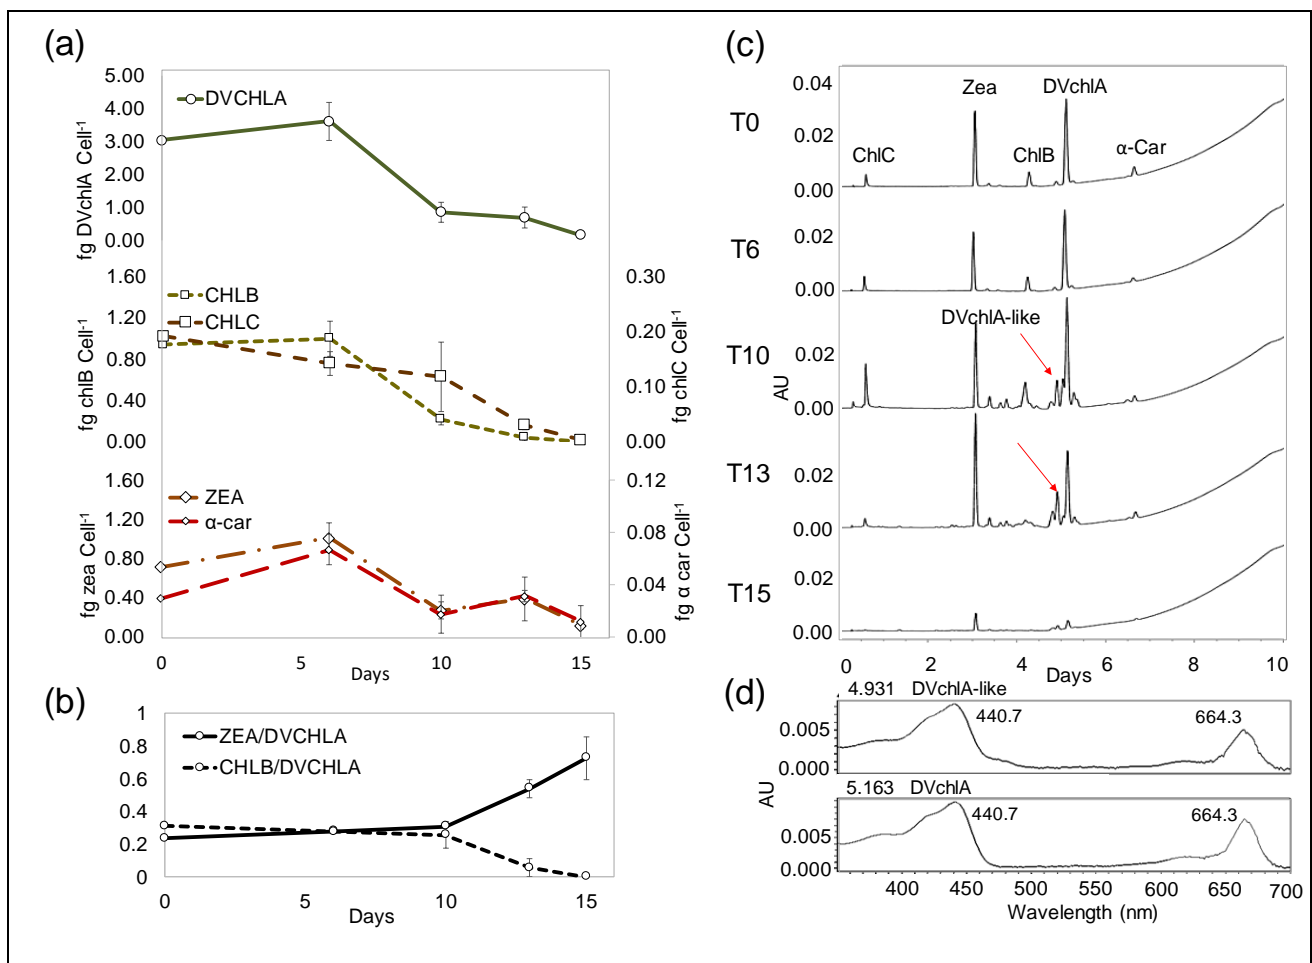

**Figure 2. Pigments content and relative composition change during growth.** (a) Changes in the major per-cell pigment quotas. Divinyl chlorophyll A - DVchlA, chlorophyll B - chlB, a chlorophyll C-like pigment - chlC, zeaxanthin - Zea, and  $\alpha$ -carotene -  $\alpha$ -car. (b) The relative abundance of zeaxanthin to DVchlA increases, while that of chlB to DVchlA decreases. (c) UPLC chromatograms at different times show the appearance of additional pigments during stationary phase. The pigment marked with an arrow has an absorption spectrum similar to that of DVchlA (panel d), but differs from it in its retention time.

256

257

### 258 **Reproducibly high rates of DOC exudation in *Prochlorococcus* MIT9312.**

259 Part of the organic carbon fixed by phytoplankton is released from the cell due to exudation and cell  
260 mortality, and this organic carbon provides sustenance for co-occurring heterotrophic bacteria. To  
261 assess how much organic C is released by *Prochlorococcus*, we measured the total organic C in our  
262 cultures, and compared it to the amount of C expected to be in the particulate fraction based on the  
263 number of cells and the carbon quota of *Prochlorococcus* from previous studies (10-130  $\mu\text{g}/\text{cell}$ , Table  
264 1). During exponential stage (day 6), the measured TOC was within the range expected based on cell  
265 numbers and C quota, however, during the stationary and decline phases the amount of TOC was up  
266 to 23-fold higher than could be explained by cell biomass, suggesting a large amount of organic C was  
267 released into the growth media (Fig 1g). To check if the high release of organic carbon is common to  
268 different *Prochlorococcus* strain, we repeated this experiment using both strain MIT9312 and strain  
269 NATL2A which belongs to the Low Light I clade (Biller et al. 2014). High extracellular concentrations  
270 of organic C (up to 13-fold higher than the predicted cellular biomass) were observed again for

271 MIT9312, whereas strain NATL2A that grew under the same N starvation conditions showed TOC  
 272 values much lower than MIT9312, within the expected range of cell quota (Fig 3).

273

274 **Table 1: *Prochlorococcus* Carbon biomass estimated in different studies, expanded from**  
 275 (Bertilsson et al. 2003)

| Strain                                                                               | fg C cell <sup>-1</sup>               | Analytical method                                                   | Reference              |
|--------------------------------------------------------------------------------------|---------------------------------------|---------------------------------------------------------------------|------------------------|
| Natural population,<br>Atlantic Ocean                                                | 10-70                                 | X ray microanalysis                                                 | (Grob et al. 2013)     |
| PCC9511, EQPAC, SB,<br>GP2, SARG, NATL1                                              | 17-34                                 | X ray microanalysis                                                 | (Heldal et al. 2003)   |
| PCC9511                                                                              | 17-38                                 | POC                                                                 | (Claustre et al. 2002) |
| MED4                                                                                 | 17-40                                 | POC                                                                 | (Fu et al. 2007)       |
| VOL7(MED4),<br>VOL8(MIT9515), VOL29,<br>VOL4 (MIT9312),<br>VOL1(MIT9215),<br>UH18301 | 18-55                                 | POC                                                                 | (Martiny et al. 2016)  |
| MIT9301, MED4,<br>NATL2A, MIT9313                                                    | 30-33 (HL),<br>45 (LLI),<br>80 (LLIV) | Macromechanical mass<br>sensor, assuming C is<br>50% of wet biomass | (Cermak et al. 2016)   |
| MIT9301, MED4,<br>MIT9313                                                            | 44-51 (HL),<br>~180<br>(LLIV)         | POC                                                                 | (Becker et al. 2014)   |

|                                                                            |         |                                                                                                           |                           |
|----------------------------------------------------------------------------|---------|-----------------------------------------------------------------------------------------------------------|---------------------------|
| MED4                                                                       | 46-61   | POC                                                                                                       | (Bertilsson et al. 2003)  |
| CCMP1378(MED4)                                                             | 49+/-9  | POC                                                                                                       | (Cailliau et al. 1996)    |
| Generic<br>(0.6 $\mu\text{m}$ diameter cell)                               | 53      | Cell size and volume-<br>carbon conversion<br>(470 fg C/ $\mu\text{m}^3$ )                                | (Campbell et al. 1994)    |
| Natural population,<br>Atlantic Ocean                                      | 56      | Cell size and volume-<br>carbon conversion<br>(325 fg C/mm <sup>3</sup> )                                 | (DuRand et al. 2001)      |
| Generic<br>(0.8 $\mu\text{m}$ diameter cell)                               | 59      | Cell size and volume-<br>carbon conversion<br>(220 fg C/mm <sup>3</sup> )                                 | (Li et al. 1992)          |
| MIT9211, MIT9215,<br>MIT9312, MED4, SS120,<br>MIT9302, MIT9303,<br>MIT9313 | 61-94   | Primary production,<br>potential overestimation<br>(does not account for<br>respiration and<br>exudation) | (Moore 1997)              |
| MIT9312                                                                    | 67-123  | Macromolecular pools                                                                                      | This study                |
| MED4, MIT9401, SS120                                                       | 78+/-27 | Dry weight, assuming C<br>is 50% of biomass                                                               | (Shaw et al. 2003)        |
| Generic<br>(0.8 $\mu\text{m}$ diameter cell)                               | 124     | Cell size and volume-<br>carbon conversion<br>(294 fg C/cell)                                             | (Veldhuis and Kraay 1990) |

276

277



278

279

280

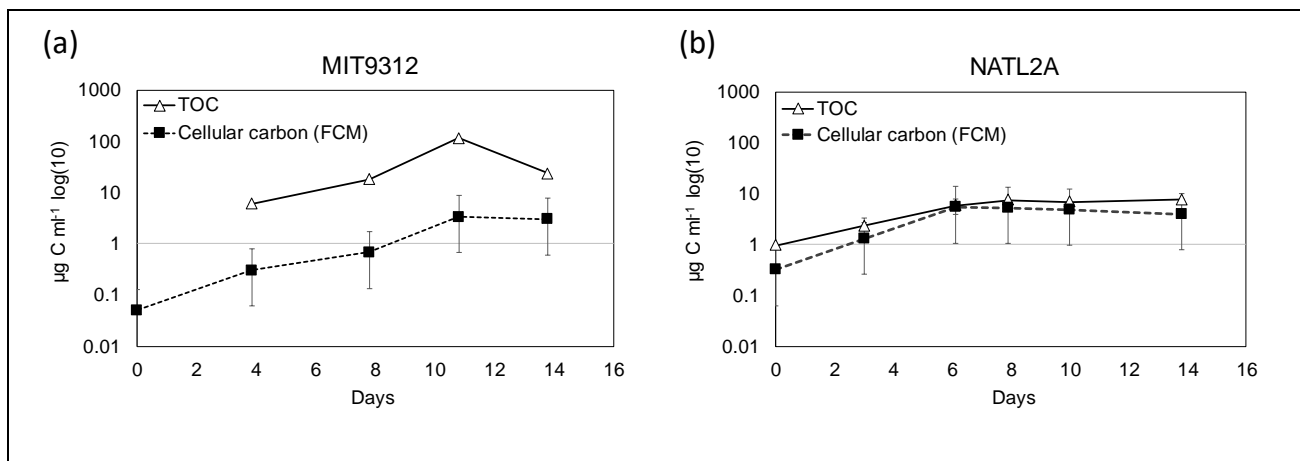

**Figure 3: Differences in exudation rates between two axenic *Prochlorococcus* strains, MIT9312**

**( a ) and NATL2A ( b ).** The two strains were grown under identical conditions. Triangles show measured Total Organic Carbon (TOC), squares show calculated C in cell biomass, based on flow cytometry counts and on per-cell C quotas. The range shown represents uncertainty due to the differences in estimates of per-cell C quotas between studies (Table 1), with the square markers showing a value of  $50 \text{ fg cell}^{-1}$ . Panel a shows an independent experiment from that shown in Fig 1h, yet the high release of DOC is consistent.

281

282

**Figure 3: Differences in exudation rates between *Prochlorococcus* strains.**

283

284 **Discussion**

285

Quantitative measurements of cellular parameters, including macromolecular composition and

286

elemental quotas, are fundamental to our understanding (and modeling) of microbial systems.

287 However, measurements of the per-cell C quota of *Prochlorococcus*, performed using different  
288 techniques, range over an order of magnitude (Table 1, (Bertilsson et al. 2003)). In this study, we  
289 directly measured the cell quotas of DNA, RNA and photosynthetic pigments at different physiological  
290 stages of laboratory batch culture in *Prochlorococcus* MIT9312. With some assumptions, these  
291 measurements can be used to constrain upper and lower bounds of the total cell quotas of C, N and P  
292 (Supplementary text, Supplementary Table 1). Measuring these macromolecular pools requires less  
293 biomass and can be performed at higher throughput compared to measurements of total particulate or  
294 dissolved C and N (Supplementary text). Assuming a lower bound on the C:N ratio of 6 (Bertilsson et  
295 al. 2003, Martiny et al. 2013, Martiny et al. 2016), the cellular C quota we estimate (~67-123 fg cell<sup>-1</sup>,  
296 Supplementary Table 1) is at the upper range of measurements from other studies (Table 1), and is  
297 driven primarily by the high (and mostly stable) measurements of protein/cell. Like any other  
298 experimental result, these measurements are sensitive to the experimental design and the methodology  
299 used. For example, while the method we used for protein determination (BCA) is relatively insensitive  
300 to the effects of salts and detergents (if these are incorporated into the standard curve), the quantitative  
301 results can be affected by, for example, the protein standards used (e.g. Bovine Serum Albumin or  
302 Immunoglobulin). Similarly, our estimates of DNA/cell are about one-third those expected from cell  
303 number and the genome size of MIT9312 (1.7Mbp, (Kettler et al. 2007)). Experimental measurements  
304 of DNA/cell that are not consistent with genome size have been observed also in other studies  
305 (Zimmerman et al. 2014), and may be caused by differences in the DNA extraction efficiency across  
306 organisms or culture conditions. Finally, the *Prochlorococcus* population is not homogenous,  
307 containing at times two distinct sub-populations of cells, with different flow cytometry signatures (as  
308 discussed in detail below, Fig S1, see also (Coe et al. 2016, Roth-Rosenberg et al. 2019)). We did not  
309 measure the amount of the macromolecular pools in each sub-population separately, due to the  
310 difficulty in obtaining sufficient biomass from non-fixed cells sorted by fluorescence-activated cell

311 sorting. With these uncertainties in mind, in the following sections we use the measurements of  
312 macromolecular pools at different growth stages, as well as the estimates of cellular C, N and P, to  
313 discuss the relationship between cell physiology, macromolecular pools and elemental budgets. Doing  
314 so, we note the need for an in-depth comparison of measurements between labs, growth stages and  
315 methods, perhaps along the lines of similar studies used to calibrate pigment measurements (e.g.  
316 (Claustre et al. 2004)).

317

318 **Dynamic changes in the macromolecular composition of *Prochlorococcus* in batch culture –**  
319 **changes in the average cell or sub-populations?**

320 In our laboratory batch cultures, *Prochlorococcus* grow exponentially until they run out of their  
321 nitrogen source (NH<sub>4</sub>), at which stage they stop growing, enter a short stationary stage and finally die.  
322 During this time, the cultures lose their green color, the cell population became heterogeneous, and  
323 populations of low-fl cells emerge, forming the majority of the population as the cultures decline (Fig  
324 1a, Fig S1a). The low-fl cells also stain weaker with the dye Sybr-green (Fig S1), which binds both  
325 DNA and RNA (albeit with a higher affinity for DNA, (Martens-Habbena and Sass 2006)). We propose  
326 that a significant part of the changes in the mean per-cell concentration of chlorophyll and RNA is  
327 caused by the presence of these low-fl cells, rather than by a gradual change in the concentration of  
328 these pools per cell. In the model cyanobacteria *Synechococcus elegantus* PCC7942 and *Synechocystis*  
329 PCC6803, the loss of culture chlorophyll (chlorosis) is part of a developmental program to generate  
330 resting stages, that can survive long-term starvation (e.g. (Sauer et al. 2001, Klotz et al. 2016)). In  
331 contrast, we have recently shown that *Prochlorococcus* cultures that become chlorotic cannot revive  
332 when nutrients are added, unless co-cultured with a heterotrophic bacterium (Roth-Rosenberg et al.  
333 2019). Nevertheless, some of the chlorotic cells are still active (photosynthesize and take up NH<sub>4</sub>,

334 (Roth-Rosenberg et al. 2019)). Thus, we interpret the changes observed in the macromolecular pools  
335 of the MIT9312 cultures, and primarily those that can be attributed to the low-fl (chlorotic) population,  
336 as physiological responses to N starvation that nevertheless are not sufficient to enable the cells to  
337 survive long-term nutrient stress.

338 In parallel to the observed loss of culture fluorescence and the appearance (and dominance) of low-fl  
339 cells, changes were also in the per-cell concentration and composition of the photosynthetic pigments  
340 (Fig 1h, Fig 2). Specifically, the mean relative amount of zeaxanthin increases compared to DVchlA,  
341 whereas the relative amount of chlorophyll B decreases (Fig 2b). Similar changes were observed in  
342 nutrient-replete batch cultures of other *Prochlorococcus* (strains MED4 and SS120) in response to  
343 increasing light intensities (Moore et al. 1995). One possible interpretation, which we deem less likely,  
344 is that the changes in the pigment ratio as the cells enter stationary phase and start declining are due to  
345 increased light levels as many of the cells become chlorotic and the cultures become clear. An  
346 alternative interpretation is that the increase in relative abundance of zeaxanthin is a general stress  
347 response, as these pigments may act as antioxidants in cyanobacteria (Zhu et al. 2010). Indeed, an  
348 increase in the zeaxanthin-DVchlA ratio was observed upon nitrogen starvation also in an additional  
349 *Prochlorococcus* strain, SS120 (Steglich et al. 2001). The decrease in chlorophyll B can also be  
350 interpreted independently from a potential change in light levels. The reduction in DVchlB could  
351 simply be related to the deactivation of the photosystems, in agreement with previous studies that  
352 showed a decrease in photosynthetic activity (e.g. Fv/Fm) and psbA protein levels upon nitrogen  
353 starvation (Steglich et al. 2001, Tolonen et al. 2006). Alternatively, the reduction in DVchlB may be  
354 part of a cellular mechanism to reduce the use of N-containing pigments under N starvation, as  
355 chlorophylls contain nitrogen, whereas xanthophylls do not. This is consistent with other mechanisms  
356 whereby *Prochlorococcus* conserve N, including changes in the transcriptional profiles (Tolonen et al.

357 2006), use of shorter transcripts (Read et al. 2017) and, potentially, “thrifty” N use in proteins expressed  
358 in response to N starvation (Gilbert and Fagan 2011).

359 The emergence of the DVchlA-like pigment is currently unexplained, although this pigment may be  
360 an epimerization product of DVchlA (DVchlA’). DVchlA’ has been previously observed in several  
361 *Prochlororoccus* strains (Komatsu et al. 2016), and in our study the DVchlA-like pigment is associated  
362 with culture decline. Generally speaking, harvesting cells from late exponential stage or early  
363 stationary stage is a common practice when high biomass is required, yet as discussed above the  
364 physiology of the cells can change during stationary phase in comparison with exponentially-growing  
365 cells. Additionally, it is currently unclear to what extent processes observed in late stages of laboratory  
366 batch cultures, such as nutrient starvation and the subsequent changes in cell physiology, occur in  
367 nature. Nevertheless, the observation that a pigment with the same retention time and absorption  
368 spectrum as the DVchlA-like pigment observed at-sea suggests that at least some of the cells in nature  
369 may be undergoing processes similar to those we observe in the laboratory batch cultures.

370 The high-fl cells also exhibit an increase in mean forward scatter, a proxy for cell size. This occurs  
371 despite the overall reduction in RNA, pigments and (to a lesser extent) protein (Fig 1e, f), which are  
372 the major N-containing macromolecular pools. Assuming the increase in forward scatter represents an  
373 increase in cell biomass, this suggests that the cells are accumulating primarily C-rich macromolecules  
374 such as storage carbohydrates and lipids, leading to an increased C:N ratio. A similar response to  
375 nitrogen starvation has been predicted by mathematical models of N-starved cells (Grossowicz et al.  
376 2017) and observed in other phytoplankton species (Hu et al. 2008, Breuer et al. 2012, Liefer et al.  
377 2019). If these processes occur in nature, they could impact the C:N ratio of DOM released from dead  
378 *Prochlorococcus* cells (e.g. (Agusti and Sanchez 2002, Llabrés et al. 2011, Ribalet et al. 2015)) as well  
379 as POM exported by these cells (Richardson and Jackson 2007, Lomas and Moran 2012, Zhao et al.  
380 2017).

381

382 **The macromolecular composition of *Prochlorococcus* MIT9312 is more akin to eukaryotic**  
383 **phytoplankton than to heterotrophic bacteria**

384 Phytoplankton and heterotrophic bacteria are inherently different in their life histories, and this likely  
385 determines and constrains the relative allocation of energy and elements to different molecular  
386 functions. Phytoplankton need to allocate resources to the photosynthetic and carbon fixation  
387 machineries and are likely less constrained by the availability of carbon (which can be derived from  
388 photosynthesis) compared to other elements such as nitrogen. Eukaryotic phytoplankton are also often  
389 larger than bacteria, and thus are less constrained by the internal volume of the cell. Heterotrophic  
390 bacteria, in contrast, do not need to allocate resources to photosynthesis but are potentially limited by  
391 C and by cell size. As shown in Fig 4, the limited number of measurements of macromolecular pools  
392 in marine microorganisms available in the literature supports the idea phytoplankton and bacteria  
393 allocate resources differently.

394 Generally speaking, phytoplankton have a lower RNA/protein ratio than heterotrophic bacteria with  
395 the same RNA/DNA ratio. Assuming that the ribosomes of phytoplankton and bacteria have similar  
396 maximal rates of protein production (chain elongation), this suggests that phytoplankton ribosomes are  
397 working at a higher relative capacity. In phytoplankton, a significant amount of protein production  
398 needs to be invested in maintaining the photosynthetic apparatus, for example in the replacement of  
399 the core proteins (Zavřel et al. 2019). An alternative (but non-exclusive) explanation is that  
400 heterotrophic bacteria (primarily copiotrophic ones) maintain more ribosomes than needed, using the  
401 “spare” production capacity to allow rapid response to changes in growth conditions. Such a strategy  
402 has been demonstrated experimentally for *E. coli* (e.g. (Li et al. 2018). Notably, some bacteria, such as  
403 *Psychrobacter Mor119*, *Halomonas Hal146*, *Vibrio Vib2d* and *Ruegeria Oce241*, are more similar in

404 the RNA/protein ratio to phytoplankton (Fig 4). The reason for this similarity, which may represent a  
405 lower ability to allocate ribosome resources to rapid changes in gene expression, is unclear, and may  
406 depend on the specific experimental conditions employed in their study (Zimmerman et al. 2014).  
407 While *Prochlorococcus* is a bacterium (prokaryote), its RNA/protein and RNA/DNA ratios at different  
408 stages of the growth curve all fall within the range of those from eukaryotic phytoplankton. The single  
409 measurement from *Synechococcus* is also closer to other phytoplankton (Fig 4). This could be the result  
410 of both the need to invest in maintaining the photosystem and, potentially, that *Prochlorococcus* may  
411 have a lower ability compared to fast-growing heterotrophs to “ramp up” their translation in order to  
412 rapidly respond to changes in environmental conditions.

413 Nevertheless, *Prochlorococcus* may still maintain some unused ribosome capacity. In our study,  
414 protein/cell remained relatively stable, with a decline of no more than ~30% as the culture declined.  
415 RNA/cell, in contrast, dropped by more than 80% over the same period (Fig 1). The decline in  
416 RNA/cell also started earlier. This suggests either that processes resulting in the loss of protein (e.g.  
417 degradation, exudation or excretion) were strongly reduced in stationary and decline phase cells, or  
418 that the actual rate of protein production per ribosome increased in declining cultures compared to  
419 exponentially-growing ones. These two explanations - decrease in loss processes or increase in  
420 ribosome efficiency - are not mutually exclusive, but evidence is lacking for either of them in most  
421 organisms, including *Prochlorococcus*.

422 **Figure 4. RNA/DNA and RNA/protein compared to those of other phytoplankton and bacteria.**

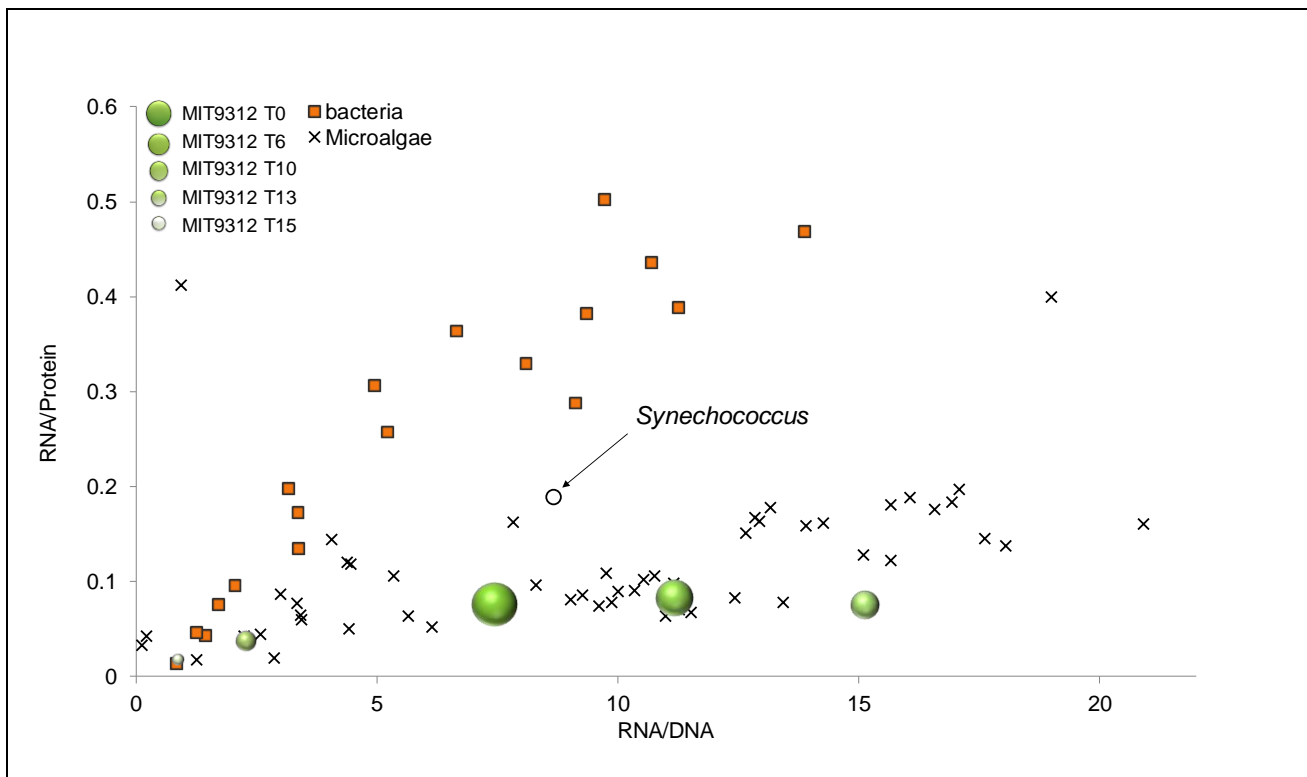

**Figure 4. RNA/DNA and RNA/protein compared to those of other phytoplankton and bacteria.**

The ratios in phytoplankton (from (Finkel et al. 2016)), presented in cross markers , show a high diversity of RNA/DNA, while relatively low diversity of RNA/Proteins compositions. Heterotrophs bacteria however ( squares) are highly diverse in both RNA/Proteins and RNA/DNA composition (Churchward et al. 1982, Neidhardt et al. 1990, Zimmerman et al. 2014). *Prochlorococcus* MIT9312 at different growth phases (spheres of different sizes) are in fact similar to microalgae rather to bacterial macromolecule composition. The most phylogenetically related cyanobacteria, *Synechococcus* WH7803, marked in circle, shows similarity to MIT9312 in the RNA/DNA but not in the RNA/Protein ratios.

423

#### 424 **DOC accumulation and its potential mechanism**

425 One of the surprising observations of this study was the high rate of accumulation of DOC during the

426 exponential growth of MIT9312. By the time the cultures reached stationary stage (day 13 in Fig 1h



427 and day 11 in Fig 3a) the particulate organic carbon (i.e. cell biomass ) was only 3-7% of the total  
428 organic carbon (considering the two experiments shown in Fig 1h and 3h, and assuming a cell C quota  
429 of 120 fg cell<sup>-1</sup>). This suggests that 80-85% of the organic carbon fixed by *Prochlorococcus* in two  
430 separate experiments was released as dissolved organic carbon. Previous experimental studies where  
431 DOC release was measured using <sup>14</sup>C as a tracer suggested that 2-24% of the primary productivity is  
432 released (Bertilsson et al. 2005, Lopez-Sandoval et al. 2013). However, indirect assessments suggest  
433 that a somewhat higher fraction of the fixed carbon is lost from the cells. First, a comparison of carbon  
434 uptake through photosynthesis and growth rate in *Prochlorococcus* MED4 over a diel cycle suggested  
435 that ~30% of the fixed carbon is released or respired (Zinser et al. 2009). Second, the theoretical growth  
436 rate of MIT9312 based on the expected yield of photosynthesis (taking into account published values  
437 for illumination, cross section, efficiency and chlorophyll/cell, (Moore and Chisholm 1999)) is almost  
438 two-fold higher than measured (expected  $\mu=0.64 \text{ day}^{-1}$ , compared to  $0.35 \pm 0.02 \text{ day}^{-1}$  measured during  
439 exponential stage, see Supplementary Information for more details). Third, we used a mathematical  
440 model of a generalized phytoplankton, resolving the macromolecular pools measured in this  
441 experiment, to test whether the exudation rates we observed are feasible. The model was able to  
442 reproduce quite well some of the experimental results, including the accumulation of DOC (observed  
443 as an increase in TOC, Figs S3-S5, Supplementary Table S2). This model reproduced well the cell  
444 density, the uptake of inorganic N and the reduction after stationary stage in the cellular quotas of RNA  
445 and chl-a, although the timing in the decline of the protein quota per cell was predicted to be earlier  
446 than observed experimentally. Importantly, while the values of C fixation per unit chl-a in most of  
447 the model simulations were within the range of the maximum photosynthesis measured for  
448 *Prochlorococcus* (up to 10-20 mol C[g divinyl Chl-a]<sup>-1</sup>day<sup>-1</sup>, (Moore and Chisholm 1999, Bruyant et  
449 al. 2005, Felcmanová et al. 2017)), this value had to vary over the dynamics of batch culture for the  
450 model to reproduce well the accumulation of TOC, increasing transiently as the cells entered the

451 decline phase (Fig S5). This phenomenon – an increase in photosynthetic efficiency in cells entering  
452 chlorosis (potentially caused by a reduction in self-shading, (Felcmanová et al. 2017)) - has not, to  
453 the best of our knowledge, been described previously. An alternative explanation is that the respiration  
454 rates decrease in relation to growth rate as the cells enter chlorosis (Fang et al. 2019). The current  
455 model formulation cannot distinguish between these two possibilities, and thus experimental  
456 measurements of photosynthesis and respiration across batch culture are required to test these two  
457 alternative model predictions. Taken together, these considerations show that while the rates of DOC  
458 release recorded here are 2-3 fold higher than those demonstrated experimentally (e.g. using  $^{14}\text{C}$  release  
459 assays), they are within the range of growth rates possible based on theoretical considerations.

460

461 The differences between our results, based on accumulation of DOC over time, and estimates of  
462 exudation based on  $^{14}\text{C}$  partitioning between the particulate and dissolved phases, may also be due to  
463 loss of volatile substances during the acidification and subsequent venting of inorganic  $^{14}\text{C}$  during  
464 radioactive incorporation experiments. Indeed, *Prochlorococcus* produce several volatile substances  
465 (e.g. organic acids, organohalogens, methane and isoprene, (Shaw et al. 2003, Bertilsson et al. 2005,  
466 Hughes et al. 2011, Bižić-Ionescu et al. 2019)), although to what extent these substances would be lost  
467 from the media during the protocol for measuring  $^{14}\text{C}$  incorporation is unclear. Thus, our results  
468 showing high release of DOC are consistent with theoretical calculations and (some) previous studies,  
469 but also highlight the need for additional studies, specifically addressing DOC release using different  
470 analytical methods.

471 The DOM released by *Prochlorococcus* can include, in addition to C, also other elements such as N  
472 and P. While we did not measure this experimentally, a rough estimate of the loss processes N and P  
473 can be obtained by comparing the total amount of N and P in the original media and the estimated

474 amount of N and P in the cells at their maximum density. Since *Prochlorococcus* do not fix dinitrogen  
475 or perform denitrification, the N “missing” from the cell biomass when reach stationary stage under  
476 N-starved conditions should represents organic N that were lost from the cells in a format that is not  
477 available for re-uptake (i.e. refractory to *Prochlorococcus*). At the peak of the *Prochlorococcus* growth  
478 in our experiment, on day 10, the cellular N accounted for 79% of the total N in the media. Given that,  
479 on that day,  $\text{NH}_4$  in the media was depleted, this suggests that ~20% of the N had already been released  
480 from the cells in a form that is not available for re-utilization. Thus, while C rich, the DOM released  
481 by *Prochlorococcus* MIT9312 contains significant amounts of other elements, likely (at least in part)  
482 in the form of proteins, amino acids, DNA, RNA and nucleotides. This is consistent with studies in  
483 *Synechococcus* (Christie-Oleza et al. 2015, Christie-Oleza et al. 2017, Zhao et al. 2017) and with the  
484 effect of *Prochlorococcus*-derived DOM on gene expression in natural communities (Sharma et al.  
485 2014). With regard to P, a similar calculation shows that only ~3.2% of the total P in the media was  
486 found in cellular biomass, while the  $\text{PO}_4$  concentration in the media dropped from 50 $\mu\text{M}$  to 34-36 $\mu\text{M}$ ,  
487 a reduction of ~30%. Thus, either we have significantly underestimated total cellular P (i.e. there is an  
488 additional, unmeasured pool besides RNA, DNA and phospholipids), or a significant amount of P has  
489 been converted from  $\text{PO}_4$  to extracellular DOP.

490 While our understanding of biogeochemistry is framed in terms of elements, cells actually release the  
491 same macromolecules from which they are built, e.g. the proteins, DNA and RNA measured in this  
492 study. Previous studies have suggested that *Prochlorococcus* release, in addition to the volatile  
493 compounds described above, also TEP (Iuculano et al. 2017), and that at least part of the produced  
494 DOM (the hydrophobic fraction that can be analyzed following solid-phase extraction) differs from  
495 strain to strain, and even between replicate cultures (Becker et al. 2014). *Prochlorococcus* have also  
496 been shown to release vesicles containing proteins and nucleic acids (Biller et al. 2014). Furthermore,  
497 DOC loss from cultures can be due not only to passive leakage from the cells (exudation) or active

498 release (excretion) but also to lysis of dead cells (reviewed by (Thornton 2014)), with the latter process  
499 likely releasing most or all of the cellular macromolecular content. Several studies have indicated that  
500 up to ~20% of the cells in exponentially-growing *Prochlorococcus* cultures may be dead (Agusti and  
501 Sanchez 2002, Hughes et al. 2011). Therefore, it is likely that all of these processes (exudation,  
502 excretion, vesicle production and mortality) contribute to DOM formation.

503 Several studies have suggested that high rates of DOC release occur in oligotrophic regions of the  
504 oceans, and that DOC, rather than POC, contributes significantly to carbon export from the photic zone  
505 in these areas (Guyennon et al. 2015, Roshan and DeVries 2017). It is tempting to speculate that  
506 *Prochlorococcus* may be at least partially responsible for this DOC accumulation, based on the high  
507 rates of DOC production observed here by *Prochlorococcus* MIT9312, a member of the HL-II clade  
508 that numerically dominates large areas of the oligotrophic ocean (Bouman et al. 2006, Johnson et al.  
509 2006). In support of this speculation, DOM released by *Prochlorococcus* in the surface waters of the  
510 Pacific Ocean (which was dominated by the HL-II clade) has been suggested to provide as much as  
511 75% of the daily organic carbon produced (Ribalet et al. 2015), although it is unclear to what extent  
512 mortality compared to exudation feeds this organic pulse. It has also been suggested that DOM derived  
513 from *Prochlorococcus* contributes a significant amount to deep sea DOM (Zhao et al. 2017). We note,  
514 however, that DOC production rates may differ based on the physiological states of the cells and the  
515 surrounding nutrient conditions. For example, similar to our study, Bertilsson and co-workers also  
516 noted differences between two strains of *Prochlorococcus*, MIT9312 and MED4, with the former  
517 releasing approximately twice as much DOC (Bertilsson et al. 2005), and Becker and co-workers  
518 documented differences in the composition of released DOM (Becker et al. 2014). Future work is  
519 required to determine the to what extent DOM production changes between strains and across culture  
520 conditions, what are the mechanisms of this process, and to what extent assessments of DOM release  
521 under lab conditions can be extended to the ocean.

522

## 523 **Acknowledgements**

524 We thank Hila Elifantz, Ilana Berman-Frank, Eyal Geisler and Edo Bar-Zeev for the TOC analyses  
525 and Jack Silberman for the DIC analysis. This study was supported by the Gordon & Betty Moore  
526 Foundation (grant number GBMF #3778, to MJF), by the Human Frontiers Science Program (grant  
527 number grant RGP0020/2016, to DS) and by the United States-Israel Binational Science Foundation  
528 (Grant number 2010183 to DS and MJF and grant number 2016532 to DS).

529

## 530 **Author contributions**

531 DR, DA, AWO, MJF and DS conceived the study and designed the experiments. DR and DA  
532 performed the experiments and analyzed the samples. AWO performed the modelling. DR and DS  
533 wrote the manuscript with contributions from all authors.

534

## 535 **Competing interests**

536 The authors declare no competing interests

537

## 538 **Materials and Correspondence**

539 Please send requests for materials or other correspondence to Daniel Sher, [dsher@univ.haifa.ac.il](mailto:dsher@univ.haifa.ac.il)

540

541

542

543

## 544 **References**

545

- 546 Agusti, S. and M. C. Sanchez (2002). "Cell viability in natural phytoplankton communities quantified by a  
547 membrane permeability probe." *Limnology and Oceanography* **47**(3): 818-828.
- 548 Aharonovich, D. and D. Sher (2016). "Transcriptional response of Prochlorococcus to co-culture with a marine  
549 Alteromonas: differences between strains and the involvement of putative infochemicals." *ISME J* **10**(12):  
550 2892-2906.
- 551 Becker, J. W., P. M. Berube, C. L. Follett, J. B. Waterbury, S. W. Chisholm, E. F. DeLong and D. J. Repeta  
552 (2014). "Closely related phytoplankton species produce similar suites of dissolved organic matter." *Frontiers*  
553 *in Microbiology* **5**.
- 554 Bertilsson, S., O. Berglund, D. M. Karl and S. W. Chisholm (2003). "Elemental composition of marine  
555 Prochlorococcus and Synechococcus: Implications for the ecological stoichiometry of the sea." *Limnology and*  
556 *Oceanography* **48**(5): 1721-1731.
- 557 Bertilsson, S., O. Berglund, M. J. Pullin and S. W. Chisholm (2005). "Release of dissolved organic matter by  
558 Prochlorococcus." *Vie Et Milieu-Life and Environment* **55**(3-4): 225-231.
- 559 Berube, P. M., A. Rasmussen, R. Braakman, R. Stepanauskas and S. W. Chisholm (2019). "Emergence of trait  
560 variability through the lens of nitrogen assimilation in Prochlorococcus." *eLife* **8**: e41043.
- 561 Biller, S. J., P. M. Berube, J. W. Berta-Thompson, L. Kelly, S. E. Roggensack, L. Awad, K. H. Roache-Johnson, H.  
562 Ding, S. J. Giovannoni, G. Rocap, L. R. Moore and S. W. Chisholm (2014). "Genomes of diverse isolates of the  
563 marine cyanobacterium Prochlorococcus." *Scientific Data* **1**.
- 564 Biller, S. J., P. M. Berube, D. Lindell and S. W. Chisholm (2014). "Prochlorococcus: the structure and function  
565 of collective diversity." *Nature Reviews Microbiology* **13**: 13.
- 566 Biller, S. J., F. Schubotz, S. E. Roggensack, A. W. Thompson, R. E. Summons and S. W. Chisholm (2014).  
567 "Bacterial vesicles in marine ecosystems." *Science* **343**(6167): 183-186.
- 568 Bižić-Ionescu, M., T. Klintzsch, D. Ionescu, M. Y. Hindiyeh, M. Günthel, A. M. Muro-Pastor, W. Eckert, F.  
569 Keppler and H.-P. Grossart (2019). "Widespread methane formation by *Cyanobacteria* in aquatic  
570 and terrestrial ecosystems." *bioRxiv*: 398958.
- 571 Bouman, H. A., O. Ulloa, D. J. Scanlan, K. Zwirgmaier, W. K. Li, T. Platt, V. Stuart, R. Barlow, O. Leth, L.  
572 Clementson, V. Lutz, M. Fukasawa, S. Watanabe and S. Sathyendranath (2006). "Oceanographic basis of the  
573 global surface distribution of Prochlorococcus ecotypes." *Science* **312**(5775): 918-921.
- 574 Breuer, G., P. P. Lamers, D. E. Martens, R. B. Draaisma and R. H. Wijffels (2012). "The impact of nitrogen  
575 starvation on the dynamics of triacylglycerol accumulation in nine microalgae strains." *Bioresource*  
576 *Technology* **124**: 217-226.
- 577 Bruyant, F., M. Babin, B. Genty, O. Prasil, M. J. Behrenfeld, H. Claustre, A. Bricaud, L. Garzarek, J.  
578 Holtzendorff, M. Koblizek, H. Dousova and F. Partensky (2005). "Diel variations in the photosynthetic  
579 parameters of Prochlorococcus strain PCC 9511: Combined effects of light and cell cycle." *Limnology and*  
580 *Oceanography* **50**(3): 850-863.
- 581 Cailliau, C., H. Claustre, F. Vidussi, D. Marie and D. Vaultot (1996). "Carbon biomass, and gross growth rates as  
582 estimated from <sup>14</sup>C pigment labelling, during photoacclimation in Prochlorococcus CCMP  
583 1378." *Marine Ecology Progress Series* **145**(1/3): 209-221.

- 584 Campbell, L., H. A. Nolla and D. Vaultot (1994). "The importance of Prochlorococcus to community structure in  
585 the central North Pacific Ocean." Limnology and Oceanography **39**(4): 954-961.
- 586 Cermak, N., J. W. Becker, S. M. Knudsen, S. W. Chisholm, S. R. Manalis and M. F. Polz (2016). "Direct single-  
587 cell biomass estimates for marine bacteria via Archimedes' principle." The Isme Journal **11**: 825.
- 588 Christie-Oleza, J. A., D. J. Scanlan and J. Armengaud (2015). "'You produce while I clean up", a strategy  
589 revealed by exoproteomics during Synechococcus–Roseobacter interactions." PROTEOMICS: n/a-n/a.
- 590 Christie-Oleza, J. A., D. Sousoni, M. Lloyd, J. Armengaud and D. J. Scanlan (2017). "Nutrient recycling  
591 facilitates long-term stability of marine microbial phototroph–heterotroph interactions." Nature  
592 Microbiology **2**: 17100.
- 593 Churchward, G., H. Bremer and R. Young (1982). "Macromolecular composition of bacteria." Journal of  
594 Theoretical Biology **94**(3): 651-670.
- 595 Claustre, H., A. Bricaud, M. Babin, F. Bruyant, L. Guillou, F. Le Gall, D. Marie and F. Partensky (2002). "Diel  
596 variations in Prochlorococcus optical properties." Limnology and Oceanography **47**(6): 1637-1647.
- 597 Claustre, H., S. B. Hooker, L. Van Heukelem, J. F. Berthon, R. Barlow, J. Ras, H. Sessions, C. Targa, C. S.  
598 Thomas, D. van der Linde and J. C. Marty (2004). "An intercomparison of HPLC phytoplankton pigment  
599 methods using in situ samples: application to remote sensing and database activities." Marine Chemistry  
600 **85**(1-2): 41-61.
- 601 Coe, A., J. Ghizzoni, K. LeGault, S. Biller, S. E. Roggensack and S. W. Chisholm (2016). "Survival of  
602 Prochlorococcus in extended darkness." Limnology and Oceanography **61**(4): 1375-1388.
- 603 Dickson, A. G., C. L. Sabine and J. R. e. Christian (2007). Guide to best practices for ocean CO<sub>2</sub> measurement.  
604 Sidney, British Columbia, North Pacific Marine Science Organization: 191.
- 605 Dubinsky, Z. and I. Berman-Frank (2001). "Uncoupling primary production from population growth in  
606 photosynthesizing organisms in aquatic ecosystems." Aquatic Sciences **63**(1): 4-17.
- 607 DuRand, M. D., R. J. Olson and S. W. Chisholm (2001). "Phytoplankton population dynamics at the Bermuda  
608 Atlantic Time-series station in the Sargasso Sea." Deep Sea Research Part II: Topical Studies in Oceanography  
609 **48**(8–9): 1983-2003.
- 610 Elser, J. J., K. Acharya, M. Kyle, J. Cotner, W. Makino, T. Markow, T. Watts, S. Hobbie, W. Fagan, J. Schade, J.  
611 Hood and R. W. Sterner (2003). "Growth rate–stoichiometry couplings in diverse biota." Ecology Letters  
612 **6**(10): 936-943.
- 613 Fang, X., Y. Liu, Y. Zhao, Y. Chen, R. Liu, Q.-L. Qin, G. Li, Y.-Z. Zhang, W. Chan, W. R. Hess and Q. Zeng (2019).  
614 "Transcriptomic responses of the marine cyanobacterium Prochlorococcus to viral lysis products."  
615 Environmental Microbiology **21**(6): 2015-2028.
- 616 Felcmanová, K., M. Lukeš, E. Kotabová, E. Lawrenz, K. H. Halsey and O. Práčil (2017). "Carbon use efficiencies  
617 and allocation strategies in Prochlorococcus marinus strain PCC 9511 during nitrogen-limited growth."  
618 Photosynthesis Research **134**(1): 71-82.
- 619 Finkel, Z. V., M. J. Follows, J. D. Liefer, C. M. Brown, I. Benner and A. J. Irwin (2016). "Phylogenetic Diversity in  
620 the Macromolecular Composition of Microalgae." PLOS ONE **11**(5): e0155977.
- 621 Flombaum, P., J. L. Gallegos, R. A. Gordillo, J. Rincón, L. L. Zabala, N. Jiao, D. M. Karl, W. K. W. Li, M. W.  
622 Lomas, D. Veneziano, C. S. Vera, J. A. Vrugt and A. C. Martiny (2013). "Present and future global distributions  
623 of the marine Cyanobacteria <em>Prochlorococcus</em> and <em>Synechococcus</em>." Proceedings of  
624 the National Academy of Sciences **110**(24): 9824-9829.
- 625 Fu, F.-X., M. E. Warner, Y. Zhang, Y. Feng and D. A. Hutchins (2007). "EFFECTS OF INCREASED TEMPERATURE  
626 AND CO<sub>2</sub> ON PHOTOSYNTHESIS, GROWTH, AND ELEMENTAL RATIOS IN MARINE SYNECHOCOCCUS AND  
627 PROCHLOROCOCCUS (CYANOBACTERIA)1." Journal of Phycology **43**(3): 485-496.
- 628 Garcia, N. S., J. A. Bonachela and A. C. Martiny (2016). "Interactions between growth-dependent changes in  
629 cell size, nutrient supply and cellular elemental stoichiometry of marine Synechococcus." The Isme Journal  
630 **10**: 2715.
- 631 Geider, R. J. and J. La Roche (2002). "Redfield revisited: variability of C : N : P in marine microalgae and its  
632 biochemical basis." European Journal of Phycology **37**(1): 1-17.

- 633 Gilbert, J. D. J. and W. F. Fagan (2011). "Contrasting mechanisms of proteomic nitrogen thrift in  
634 *Prochlorococcus*." *Molecular Ecology* **20**(1): 92-104.
- 635 Goebel, N. L., C. A. Edwards, J. P. Zehr and M. J. Follows (2010). "An emergent community ecosystem model  
636 applied to the California Current System." *Journal of Marine Systems* **83**(3): 221-241.
- 637 Grob, C., M. Ostrowski, R. J. Holland, M. Heldal, S. Norland, E. S. Erichsen, C. Blindauer, A. P. Martin, M. V.  
638 Zubkov and D. J. Scanlan (2013). "Elemental composition of natural populations of key microbial groups in  
639 Atlantic waters." *Environmental Microbiology* **15**(11): 3054-3064.
- 640 Grossowicz, M., D. Roth-Rosenberg, D. Aharonovich, J. Silverman, M. J. Follows and D. Sher (2017).  
641 "Prochlorococcus in the lab and in silico: The importance of representing exudation." *Limnology and*  
642 *Oceanography* **62**(2): 818-835.
- 643 Gruber, N. and C. A. Deutsch (2014). "Redfield's evolving legacy." *Nature Geoscience* **7**: 853.
- 644 Guyennon, A., M. Baklouti, F. Diaz, J. Palmieri, J. Beuvier, C. Lebaupin-Brossier, T. Arsouze, K. Béranger, J. C.  
645 Dutay and T. Moutin (2015). "New insights into the organic carbon export in the Mediterranean Sea from 3-D  
646 modeling." *Biogeosciences* **12**(23): 7025-7046.
- 647 Hansell, D. A., C. A. Carlson, D. J. Repeta and R. Schlitzer (2009). "Dissolved Organic Matter in the Ocean a  
648 Controversy Stimulates New Insights." *Oceanography* **22**(4): 202-211.
- 649 Heldal, M., D. J. Scanlan, S. Norland, F. Thingstad and N. H. Mann (2003). "Elemental composition of single  
650 cells of various strains of marine *Prochlorococcus* and *Synechococcus* using X-ray microanalysis." *Limnology*  
651 *and Oceanography* **48**(5): 1732-1743.
- 652 Hu, Q., M. Sommerfeld, E. Jarvis, M. Ghirardi, M. Posewitz, M. Seibert and A. Darzins (2008). "Microalgal  
653 triacylglycerols as feedstocks for biofuel production: perspectives and advances." *The Plant Journal* **54**(4):  
654 621-639.
- 655 Hughes, C., D. J. Franklin and G. Malin (2011). "Iodomethane production by two important marine  
656 cyanobacteria: *Prochlorococcus marinus* (CCMP 2389) and *Synechococcus* sp. (CCMP 2370)." *Marine*  
657 *Chemistry* **125**(1-4): 19-25.
- 658 Iuculano, F., I. P. Mazuecos, I. Reche and S. Agustí (2017). "Prochlorococcus as a Possible Source for  
659 Transparent Exopolymer Particles (TEP)." *Frontiers in Microbiology* **8**(709).
- 660 Johnson, Z. I., E. R. Zinser, A. Coe, N. P. McNulty, E. M. Woodward and S. W. Chisholm (2006). "Niche  
661 partitioning among *Prochlorococcus* ecotypes along ocean-scale environmental gradients." *Science*  
662 **311**(5768): 1737-1740.
- 663 Kettler, G. C., A. C. Martiny, K. Huang, J. Zucker, M. L. Coleman, S. Rodrigue, F. Chen, A. Lapidus, S. Ferreira, J.  
664 Johnson, C. Steglich, G. M. Church, P. Richardson and S. W. Chisholm (2007). "Patterns and implications of  
665 gene gain and loss in the evolution of *Prochlorococcus*." *PLoS Genet* **3**(12): e231.
- 666 Klotz, A., J. Georg, L. Bučinská, S. Watanabe, V. Reimann, W. Januszewski, R. Sobotka, D. Jendrossek,  
667 Wolfgang R. Hess and K. Forchhammer (2016). "Awakening of a Dormant Cyanobacterium from Nitrogen  
668 Chlorosis Reveals a Genetically Determined Program." *Current Biology* **26**(21): 2862-2872.
- 669 Komatsu, H., K. Wada, T. Kanjoh, H. Miyashita, M. Sato, M. Kawachi and M. Kobayashi (2016). "Unique  
670 chlorophylls in picoplankton *Prochlorococcus* sp. "Physicochemical properties of divinyl chlorophylls, and the  
671 discovery of monovinyl chlorophyll b as well as divinyl chlorophyll b in the species *Prochlorococcus* NIES-  
672 2086". " *Photosynth Res* **130**(1-3): 445-467.
- 673 Li, S. H.-J., Z. Li, J. O. Park, C. G. King, J. D. Rabinowitz, N. S. Wingreen and Z. Gitai (2018). "Escherichia coli  
674 translation strategies differ across carbon, nitrogen and phosphorus limitation conditions." *Nature*  
675 *microbiology* **3**(8): 939-947.
- 676 Li, W. K. W., P. M. Dickie, B. D. Irwin and A. M. Wood (1992). "Biomass of bacteria, cyanobacteria,  
677 prochlorophytes and photosynthetic eukaryotes in the Sargasso Sea." *Deep Sea Research Part A.*  
678 *Oceanographic Research Papers* **39**(3): 501-519.
- 679 Liefer, J. D., A. Garg, M. H. Fyfe, A. J. Irwin, I. Benner, C. M. Brown, M. J. Follows, A. W. Omta and Z. V. Finkel  
680 (2019). "The Macromolecular Basis of Phytoplankton C:N:P Under Nitrogen Starvation." *Frontiers in*  
681 *Microbiology* **10**(763).



682 Llabrés, M., S. Agustí and G. J. Herndl (2011). "DIEL IN SITU PICOPHYTOPLANKTON CELL DEATH CYCLES  
683 COUPLED WITH CELL DIVISION1." Journal of Phycology **47**(6): 1247-1257.

684 Lomas, M. W. and S. B. Moran (2012). "Evidence for aggregation and export of cyanobacteria and nano-  
685 eukaryotes from the Sargasso Sea euphotic zone." Biogeosciences **7**(5): 7173-7206.

686 Lopez-Sandoval, D. C., T. Rodriguez-Ramos, P. Cermeno and E. Maranon (2013). "Exudation of organic carbon  
687 by marine phytoplankton: dependence on taxon and cell size." Marine Ecology Progress Series **477**: 53-60.

688 Lourenço, S. O., E. Barbarino, U. M. L. Marquez and E. Aidar (1998). "DISTRIBUTION OF INTRACELLULAR  
689 NITROGEN IN MARINE MICROALGAE: BASIS FOR THE CALCULATION OF SPECIFIC NITROGEN-TO-PROTEIN  
690 CONVERSION FACTORS." Journal of Phycology **34**(5): 798-811.

691 Marmen, S., L. Blank, A. Al-Ashhab, A. Malik, L. Ganzert, M. Lalar, H.-P. Grossart and D. Sher (2018). "The  
692 role of land use types and water chemical properties in structuring the microbiome of a connected lakes  
693 system." bioRxiv.

694 Martens-Habbena, W. and H. Sass (2006). "Sensitive determination of microbial growth by nucleic acid  
695 staining in aqueous suspension." Applied and environmental microbiology **72**(1): 87-95.

696 Martiny, A. C., M. L. Coleman and S. W. Chisholm (2006). "Phosphate acquisition genes in Prochlorococcus  
697 ecotypes: evidence for genome-wide adaptation." Proc Natl Acad Sci U S A **103**(33): 12552-12557.

698 Martiny, A. C., L. Ma, C. Mougnot, J. W. Chandler and E. R. Zinser (2016). "Interactions between Thermal  
699 Acclimation, Growth Rate, and Phylogeny Influence Prochlorococcus Elemental Stoichiometry." PLOS ONE  
700 **11**(12): e0168291.

701 Martiny, A. C., C. T. A. Pham, F. W. Primeau, J. A. Vrugt, J. K. Moore, S. A. Levin and M. W. Lomas (2013).  
702 "Strong latitudinal patterns in the elemental ratios of marine plankton and organic matter." Nature  
703 Geoscience **6**: 279.

704 Massana, R., A. E. Murray, C. M. Preston and E. F. DeLong (1997). "Vertical distribution and phylogenetic  
705 characterization of marine planktonic Archaea in the Santa Barbara Channel." Applied and environmental  
706 microbiology **63**(1): 50-56.

707 McDonagh, B., M. A. Domínguez-Martín, G. Gómez-Baena, A. López-Lozano, J. Diez, J. A. Bárcena and J. M.  
708 García Fernández (2012). "Nitrogen starvation induces extensive changes in the redox proteome of  
709 Prochlorococcus sp. strain SS120." Environmental Microbiology Reports **4**(2): 257-267.

710 Metropolis, N., A. W. Rosenbluth, M. N. Rosenbluth, A. H. Teller and E. Teller (1953). "Equation of State  
711 Calculations by Fast Computing Machines." The Journal of Chemical Physics **21**(6): 1087-1092.

712 Moore, L. R. (1997). Physiological ecology of Prochlorococcus : a comparison of isolates from diverse  
713 oceanographic regimes. PhD, Massachusetts Institute of Technology.

714 Moore, L. R. and S. W. Chisholm (1999). "Photophysiology of the marine cyanobacterium Prochlorococcus:  
715 Ecotypic differences among cultured isolates." Limnology and Oceanography **44**(3): 628-638.

716 Moore, L. R., A. Coe, E. R. Zinser, M. A. Saito, M. B. Sullivan, D. Lindell, K. Frois-Moniz, J. Waterbury and S. W.  
717 Chisholm (2007). "Culturing the marine cyanobacterium Prochlorococcus." Limnology and Oceanography-  
718 Methods **5**: 353-362.

719 Moore, L. R., R. Goericke and S. W. Chisholm (1995). "Comparative physiology of Synechococcus and  
720 Prochlorococcus: influence of light and temperature on growth, pigments, fluorescence and absorptive  
721 properties." Marine Ecology Progress Series **116**(1/3): 259-275.

722 Moore, L. R., A. F. Post, G. Rocap and S. W. Chisholm (2002). "Utilization of different nitrogen sources by the  
723 marine cyanobacteria Prochlorococcus and Synechococcus." Limnology and Oceanography **47**(4): 989-996.

724 Neidhardt, F. C., J. L. Ingraham and M. Schaechter (1990). Physiology of the Bacterial Cell: a Molecular  
725 Approach, Sinauer Associates, Sunderland, Mass.

726 Omta, A. W., J. Bruggeman, B. Kooijman and H. Dijkstra (2009). "The organic carbon pump in the Atlantic."  
727 Journal of Sea Research **62**(2): 179-187.

728 Omta, A. W., D. Talmy, D. Sher, Z. V. Finkel, A. J. Irwin and M. J. Follows (2017). "Extracting phytoplankton  
729 physiological traits from batch and chemostat culture data." Limnology and Oceanography: Methods **15**(5):  
730 453-466.

- 731 Partensky, F. and L. Garczarek (2010). "Prochlorococcus: Advantages and Limits of Minimalism." Annual  
732 Review of Marine Science **2**: 305-331.
- 733 Read, R. W., P. M. Berube, S. J. Biller, I. Neveux, A. Cubillos-Ruiz, S. W. Chisholm and J. J. Grzymalski (2017).  
734 "Nitrogen cost minimization is promoted by structural changes in the transcriptome of N-deprived  
735 Prochlorococcus cells." The ISME journal **11**(10): 2267-2278.
- 736 Redfield, A. C. (1934). On the Proportions of Organic Derivatives in Sea Water and Their Relation to the  
737 Composition of Plankton. James Johnstone Memorial Volume, University Press of Liverpool: 176-192.
- 738 Ribalet, F., J. Swalwell, S. Clayton, V. Jiménez, S. Sudek, Y. Lin, Z. I. Johnson, A. Z. Worden and E. V. Armbrust  
739 (2015). "Light-driven synchrony of Prochlorococcus growth and mortality in the subtropical Pacific gyre."  
740 Proceedings of the National Academy of Sciences **112**(26): 8008-8012.
- 741 Richardson, T. L. and G. A. Jackson (2007). "Small phytoplankton and carbon export from the surface ocean."  
742 Science **315**(5813): 838-840.
- 743 Roshan, S. and T. DeVries (2017). "Efficient dissolved organic carbon production and export in the  
744 oligotrophic ocean." Nature Communications **8**(1): 2036.
- 745 Roth-Rosenberg, D., D. Aharonovich, T. Luzzatto-Knaan, A. Vogts, L. Zoccarato, F. Eigemann, N. Nago, H. P.  
746 Grossart, M. Voss and D. Sher (2019). "Prochlorococcus rely on microbial interactions rather than on  
747 chlorotic resting stages to survive long-term stress." BioRxiv MS ID#: BIORXIV/2019/657627.
- 748 Saito, M. A., M. R. McIlvin, D. M. Moran, T. J. Goepfert, G. R. DiTullio, A. F. Post and C. H. Lamborg (2014).  
749 "Multiple nutrient stresses at intersecting Pacific Ocean biomes detected by protein biomarkers." Science  
750 **345**(6201): 1173-1177.
- 751 Sauer, J., U. Schreiber, R. Schmid, U. Völker and K. Forchhammer (2001). "Nitrogen Starvation-Induced  
752 Chlorosis in Synechococcus PCC 7942. Low-Level Photosynthesis As a Mechanism of Long-Term Survival."  
753 Plant Physiology **126**(1): 233-243.
- 754 Sharma, A. K., J. W. Becker, E. A. Ottesen, J. A. Bryant, S. Duhamel, D. M. Karl, O. X. Cordero, D. J. Repeta and  
755 E. F. DeLong (2014). "Distinct dissolved organic matter sources induce rapid transcriptional responses in  
756 coexisting populations of Prochlorococcus, Pelagibacter and the OM60 clade." Environmental Microbiology  
757 **16**(9): 2815-2830.
- 758 Shaw, S. L., S. W. Chisholm and R. G. Prinn (2003). "Isoprene production by Prochlorococcus, a marine  
759 cyanobacterium, and other phytoplankton." Marine Chemistry **80**(4): 227-245.
- 760 Steglich, C., M. Behrenfeld, M. Koblizek, H. Claustre, S. Penno, O. Prasil, F. Partensky and W. R. Hess (2001).  
761 "Nitrogen deprivation strongly affects Photosystem II but not phycoerythrin level in the divinyl-chlorophyll b-  
762 containing cyanobacterium Prochlorococcus marinus." Biochimica et Biophysica Acta (BBA) - Bioenergetics  
763 **1503**(3): 341-349.
- 764 Steglich, C., C. W. Mullineaux, K. Teuchner, W. R. Hess and H. Lokstein (2003). "Photophysical properties of  
765 Prochlorococcus marinus SS120 divinyl chlorophylls and phycoerythrin in vitro and in vivo." FEBS Letters  
766 **553**(1-2): 79-84.
- 767 Szul, M. J., S. P. Dearth, S. R. Campagna and E. R. Zinser (2019). "Carbon Fate and Flux in  
768 *Prochlorococcus* under Nitrogen Limitation." mSystems **4**(1): e00254-00218.
- 769 Talmy, D., A. C. Martiny, C. Hill, A. E. Hickman and M. J. Follows (2016). "Microzooplankton regulation of  
770 surface ocean POC:PON ratios." Global Biogeochemical Cycles **30**(2): 311-332.
- 771 Thompson, A. W., K. Huang, M. A. Saito and S. W. Chisholm (2011). "Transcriptome response of high- and  
772 low-light-adapted Prochlorococcus strains to changing iron availability." Isme J **5**(10): 1580-1594.
- 773 Thornton, D. C. O. (2014). "Dissolved organic matter (DOM) release by phytoplankton in the contemporary  
774 and future ocean." European Journal of Phycology **49**(1): 20-46.
- 775 Ting, C. S., G. Rocap, J. King and S. W. Chisholm (2002). "Cyanobacterial photosynthesis in the oceans: the  
776 origins and significance of divergent light-harvesting strategies." Trends in Microbiology **10**(3): 134-142.
- 777 Tolonen, A. C., J. Aach, D. Lindell, Z. I. Johnson, T. Rector, R. Steen, G. M. Church and S. W. Chisholm (2006).  
778 "Global gene expression of Prochlorococcus ecotypes in response to changes in nitrogen availability." Mol  
779 Syst Biol **2**: 53.

780 Van Mooy, B. A., G. Rocap, H. F. Fredricks, C. T. Evans and A. H. Devol (2006). "Sulfolipids dramatically  
781 decrease phosphorus demand by picocyanobacteria in oligotrophic marine environments." Proc Natl Acad Sci  
782 U S A **103**(23): 8607-8612.

783 Vargas, M. A., H. Rodríguez, J. Moreno, H. Olivares, J. A. D. Campo, J. Rivas and M. G. Guerrero (1998).  
784 "BIOCHEMICAL COMPOSITION AND FATTY ACID CONTENT OF FILAMENTOUS NITROGEN-FIXING  
785 CYANOBACTERIA." Journal of Phycology **34**(5): 812-817.

786 Veldhuis, M. and G. W. Kraay (1990). "Vertical distribution and pigment composition of a picoplanktonic  
787 prochlorophyte in the subtropical North Atlantic:a combined study of HPLC-analysis of pigments and flow  
788 cytometry." Marine Ecology Progress Series **68**: 121-127.

789 Zavřel, T., M. Faizi, C. Loureiro, G. Poschmann, K. Stühler, M. Sinetova, A. Zorina, R. Steuer and J. Červený  
790 (2019). "Quantitative insights into the cyanobacterial cell economy." eLife **8**: e42508.

791 Zhao, Z., M. Gonsior, J. Luek, S. Timko, H. Ianiri, N. Hertkorn, P. Schmitt-Kopplin, X. Fang, Q. Zeng, N. Jiao and  
792 F. Chen (2017). "Picocyanobacteria and deep-ocean fluorescent dissolved organic matter share similar optical  
793 properties." Nature communications **8**: 15284-15284.

794 Zhu, Y., J. E. Graham, M. Ludwig, W. Xiong, R. M. Alvey, G. Shen and D. A. Bryant (2010). "Roles of  
795 xanthophyll carotenoids in protection against photoinhibition and oxidative stress in the cyanobacterium  
796 *Synechococcus* sp. strain PCC 7002." Archives of Biochemistry and Biophysics **504**(1): 86-99.

797 Zimmerman, A. E., S. D. Allison and A. C. Martiny (2014). "Phylogenetic constraints on elemental  
798 stoichiometry and resource allocation in heterotrophic marine bacteria." Environmental Microbiology **16**(5):  
799 1398-1410.

800 Zinser, E. R., D. Lindell, Z. I. Johnson, M. E. Futschik, C. Steglich, M. L. Coleman, M. A. Wright, T. Rector, R.  
801 Steen, N. McNulty, L. R. Thompson and S. W. Chisholm (2009). "Choreography of the transcriptome,  
802 photophysiology, and cell cycle of a minimal photoautotroph, prochlorococcus." PLoS ONE **4**(4): e5135.

803
